# Supplementary material
Source: publisher figshare collection journal article supplement (https://rs.figshare.com/ndownloader/files/26634763)
Supplement: Supplementary file 1 [file 26634763]

## Sheet: Sheet1
Taxon	Body mass (kg)	Direct measurement	Published estimate	New mass estimation method	New measurement data source
Acratocnus antillensis	26.25		Turvey & Fritz 2011
Acratocnus odontrigonus	22.99		Turvey & Fritz 2011
Acratocnus simorhynchus	16.38		Turvey & Fritz 2011
Acratocnus ye	21.31		Turvey & Fritz 2011
Antillomys rayi	0.28			Hopkins 2008	Brace et al. 2015
Antillothrix bernensis	4.57		MacPhee & Meldrum 2006
Boromys offella	0.32		Turvey & Fritz 2011
Boromys torrei	0.12		Turvey & Fritz 2011
Brotomys contractus	0.12		Turvey & Fritz 2011
Brotomys voratus	0.4		Turvey & Fritz 2011
Capromys pilorides ciprianoi	4.25	Borroto-Páez & Mancina 2011
Capromys pilorides doceleguas	3.15			Hopkins 2008	Varona 1980
Capromys pilorides gundlachianus	2.65			Hopkins 2008	Varona 1983
Capromys pilorides lewisi	1.98		Turvey & Fritz 2011
Capromys pilorides pilorides	3.68	Borroto-Páez & Mancina 2011
Capromys pilorides relictus	3.06	Borroto-Páez & Mancina 2011
Capromys pilorides (Cuba population mean)	3.36
Clidomys osborni	18.02		Turvey & Fritz 2011
Elasmodontomys obliquus	8.45		Turvey & Fritz 2011
Geocapromys brownii	1.5	Anderson et al. 1983
Geocapromys caymanensis (Cayman Brac)	1.22		Turvey & Fritz 2011
Geocapromys caymanensis (Grand Cayman)	0.98		Turvey & Fritz 2011
Geocapromys columbianus	1.24		Turvey & Fritz 2011
Geocapromys ingrahami abaconis (Abaco)	0.83			Hopkins 2008	Direct measurement: MCZ 2108, 2712, 2712A
Geocapromys ingrahami ingrahami (East Plana Cay)	0.71	Clough 1972
Geocapromys ingrahami irrectus (Crooked Island)	1.3			Hopkins 2008	Direct measurement: MCZ 2017, 2116D-F, 2116H
Geocapromys ingrahami irrectus (Exuma)	1			Hopkins 2008	Direct measurement: MCZ, unnumbered (33 specimens)
Geocapromys ingrahami (mean)	0.96
Geocapromys thoracatus	0.89		Turvey & Fritz 2011
Heteropsomys insulans	0.93		Turvey & Fritz 2011
Hexolobodon phenax	3.16		Turvey & Fritz 2011
Hexolobodontinae sp. nov.	1.86			Imputed mass estimate
Hyperplagiodontia araeum	4.09		Hansford et al. 2012
Insulacebus toussaintiana	4.8		Cooke et al. 2011
Isolobodon montanus	1.52		Turvey & Fritz 2011
Isolobodon portoricensis (Hispaniola and assoc. islands)	0.99			Hopkins 2008	Direct measurement: AMNH, unnumbered (1 specimen); USNM 299411-414, 299416-299438, 299443-299445, 299447-299448, 299450-299451
Isolobodon portoricensis (introduced populations)	1.44			Hopkins 2008	Direct measurement: AMNH, AMNH 40957f-l, 40957n, 40957p, unnumbered (59 specimens), unnumbered: Spinden collection (5 specimens); USNM 303100
Macrocapromys acevedo	3.18		Hansford et al. 2012
Macrocapromys latus	3.66		Hansford et al. 2012
Megalocnus rodens	101.5		Turvey & Fritz 2011
Megalocnus zile	89.61		Turvey & Fritz 2011
Megalomys audreyae	0.18		Turvey & Fritz 2011
Megalomys desmarestii	0.29		Turvey et al. 2012
Megalomys georginae	0.1		Turvey et al. 2012
Megalomys luciae	0.16		Turvey & Fritz 2011
Mesocapromys angelcabrerai	0.48	Borroto-Páez & Mancina 2011
Mesocapromys auritus	0.82	Borroto-Páez & Mancina 2011
Mesocapromys kraglievichi	0.61		Turvey & Fritz 2011
Mesocapromys nanus	0.4			Hopkins 2008	Direct measurement: AMNH 134 (12 specimens), 135 (18 specimens), 137 (4 specimens); MCZ 17361, 17729-17731; USNM 238163, 269167, 300616
Mesocapromys sanfelipensis	0.61
Mysateles melanurus	1.22	Borroto-Páez & Mancina 2011
Mysateles prehensilis prehensilis	1.8	Borroto-Páez & Mancina 2011
Mysateles prehensilis gundlachi	1.66	Borroto-Páez & Mancina 2011
Neocnus comes	13.02		Turvey & Fritz 2011
Neocnus dousman	10.46		Turvey & Fritz 2011
Neocnus gliriformis	17.33		Turvey & Fritz 2011
Neocnus toupiti	7.05		Turvey & Fritz 2011
Nesophontes edithae	0.13		Turvey & Fritz 2011
Nesophontes hemicingulus (Cayman Brac)	0.03		Turvey & Fritz 2011
Nesophontes hemicingulus (Grand Cayman)	0.04		Turvey & Fritz 2011
Nesophontes hypomicrus	0.02		Turvey & Fritz 2011
Nesophontes micrus	0.04		Turvey & Fritz 2011
Nesophontes paramicrus	0.04		Turvey & Fritz 2011
Nesophontes zamicrus	0.01		Turvey & Fritz 2011
Oligoryzomys victus	0.02		Turvey & Fritz 2011
Oryzomyini undescribed species (Anguilla taxon)	0.1		Turvey & Fritz 2011
Oryzomyini undescribed species (large Grenada taxon)	0.21		Turvey & Fritz 2011
Oryzomyini undescribed species (large Montserrat taxon)	0.31		Turvey & Fritz 2011
Oryzomyini undescribed species (Saba taxon)	0.11		Turvey & Fritz 2011
Oryzomyini undescribed species (small Grenada taxon)	0.06		Turvey & Fritz 2011
Oryzomyini undescribed species (small Montserrat taxon)	0.12		Turvey & Fritz 2011
Oryzomyini undescribed species (St. Martin taxon)	0.1		Turvey & Fritz 2011
Oryzomys antillarum	0.06		Turvey & Fritz 2011
Paralouatta varonai	8.28		MacPhee & Meldrum 2006
Parocnus browni	69.2		Turvey & Fritz 2011
Parocnus serus	53.07		Turvey & Fritz 2011
Pennatomys nivalis	0.11		Turvey & Fritz 2011
Plagiodontia aedium	1.34	Turvey et al. 2015
Plagiodontia spelaeum	1.57		Hansford et al. 2012
Plagiodontia velozi	5.62		Hansford et al. 2012
Quemisia gravis	4.17		Turvey & Fritz 2011
Rhizoplagiodontia lemkei	1.7		Turvey & Fritz 2011
Sheep Pen femur (unidentified rodent taxon)	97.01		Turvey & Fritz 2011
Solenodon arredondoi	0.99		Turvey & Fritz 2011
Solenodon marcanoi	0.23		Turvey & Fritz 2011
Solenodon cubanus	0.85	Borroto-Páez & Mancina 2011
Solenodon paradoxus	0.81	Ottenwalder 1991
Tainotherium valei	4.44		Turvey & Fritz 2011
Xaymaca fulvopulvis	0.16		Turvey & Fritz 2011
Xenothrix mcgregori	5.68		MacPhee & Meldrum 2006
Zygodontomys sp.	0.06			Genus mean from Jones et al. 2009
Notes:
Hopkins (2008) estimation method: body mass estimated using “all species” regression equation for lower toothrow length against body mass in rodents
Museum abbreviations: AMNH, American Museum of Natural History; MCZ, Museum of Comparative Zoology, Harvard University; USNM, United States National Museum, Smithsonian Institution
References:
Anderson S, Woods CA, Morgan GS, Oliver WLR. 1983. Geocapromys brownii. Mammalian Species 201, 1-5.
Borroto-Páez R, Mancina CA. 2011. Mamíferos en Cuba. Vaasa, Finland: UPC Print.
Brace S, Turvey ST, Weksler M, Hoogland MLP, Barnes I. 2015. Unexpected evolutionary diversity in a recently extinct Caribbean mammal radiation. Proceedings of the Royal Society B 282, 20142371.
Clough GC. 1972. Biology of the Bahaman hutia, Geocapromys ingrahami. Journal of Mammalogy 53, 807-823.
Cooke S, Rosenberger AL, Turvey S. 2011. An extinct monkey from Haiti and the origins of the Greater Antillean primates. Proceedings of the National Academy of Sciences of the USA 108, 2699-2704.
Hansford J, Nuñez-Miño JM, Young RP, Brace S, Brocca JL, Turvey ST. 2012. Taxonomy-testing and the ‘Goldilocks Hypothesis’: morphometric analysis of species diversity in living and extinct Hispaniolan hutias. Systematics and Biodiversity 10, 491-507.
Hopkins SSB. 2008. Reassessing the mass of exceptionally large rodents using toothrow length and area as proxies for body mass. Journal of Mammalogy 89, 232-243.
Jones KE et al. 2009. PanTHERIA: a species-level database of life history, ecology and geography of extant and recently extinct mammals. Ecology 90, 2648.
MacPhee RDE, Meldrum J. 2006. Postcranial remains of the extinct monkeys of the Greater Antilles, with evidence for semiterrestriality in Paralouatta. American Museum Novitates 3516, 1-65.
Ottenwalder JA. 1991. The systematics, biology, and conservation of Solenodon. PhD dissertation, University of Florida.
Turvey ST, Fritz SA. 2011. The ghosts of mammals past: biological and geographical patterns of global mammalian extinction across the Holocene. Philosophical Transactions of the Royal Society B 366, 2564-2576.
Turvey ST, Brace S, Weksler M. 2012. A new species of recently extinct rice rat (Megalomys) from Barbados. Mammalian Biology 77, 404-413.
Turvey ST, Hansford J, Kennerley RJ, Nuñez-Miño JM, Brocca JL, Young RP. 2015. A new subspecies of hutia (Plagiodontia, Capromyidae, Rodentia) from southern Hispaniola. Zootaxa 3957, 201-214.
Varona LS. 1980. Una nueva subespecie de Capromys pilorides (Rodentia, Capromyidae). Memoria Sociedad Ciencias Naturales La Salle 40(114), 141-150.
Varona LS. 1983. Nueva subespecie de jutia conga, Capromys pilorides (Rodentia: Capromyidae). Caribbean Journal of Science 19, 77-79.
